# Supplementary material for: Un sincero e competente amico della psicologia
Source: MDPI journal article supplement (doi:10.3390/jcm12103550), 2011-01-01
Supplement: s1 [file s1]

**Table S1.** Summary of included studies and parameters.

| Author<br>, Year          | Category              | Number<br>of<br>patients | Type of surgery          | Camera<br>system         | Software                   | Parameter          | Endpoints           | ICG in<br>mg<br>(absolute) | ICG<br>in<br>mg/kg | Timing         |
|---------------------------|-----------------------|--------------------------|--------------------------|--------------------------|----------------------------|--------------------|---------------------|----------------------------|--------------------|----------------|
| Protyniak,<br>2015        | Colorectal<br>surgery | 77                       | Laparoscopic             | Stryker                  | Stryker                    | Intensity          | Anastomotic<br>leak | -                          | -                  | Intraoperative |
| Wada,<br>2017             | Colorectal<br>surgery | 112                      | Laparoscopic             | Hamatsu<br>Photonics     | Hamatsu<br>Photonics       | Intensity,<br>Time | Anastomotic<br>leak | 5                          | -                  | Intraoperative |
| Son,<br>2019              | Colorectal<br>surgery | 86                       | Laparoscopic             | Karl Storz               | Open<br>source             | Intensity,<br>Time | Anastomotic<br>leak | -                          | 0.25               | Intraoperative |
| Van den Bos,<br>2019      | Colorectal<br>surgery | 30                       | Laparoscopic             | Karl Storz,<br>Intuitive | Paid<br>Program            | Intensity          | Anastomotic<br>Leak | -                          | 0.2                | Intraoperative |
| Hayami,<br>2019           | Colorectal<br>surgery | 22                       | Laparoscopic,<br>Robotic | Karl Storz,<br>Intuitive | Hamatsu<br>Photonics       | Intensity,<br>Time | Anastomotic<br>Leak | 5                          | -                  | Intraoperative |
| Amagai,<br>2019           | Colorectal<br>surgery | 69                       | Laparoscopic             | Olympus                  | Open<br>source             | Intensity,<br>Time | Anastomotic<br>Leak | -                          | 0.2                | Intraoperative |
| Iwamoto,<br>2020          | Colorectal<br>surgery | 25                       | Laparoscopic             | Stryker                  | Hamatsu<br>Photonics       | Time               | Anastomotic<br>Leak | 7.5                        | -                  | Intraoperative |
| Park,<br>2020             | Colorectal<br>surgery | 65                       | Laparoscopic             | Stryker                  | Custom<br>made<br>software | Intensity,<br>Time | Anastomotic<br>Leak | -                          | 0.2                | Intraoperative |
| Han,<br>2022              | Colorectal<br>surgery | 22                       | Laparoscopic,<br>robotic | Olympus,<br>Intuitive    | Paid<br>Program            | Intensity,<br>Time | Anastomotic<br>Leak | 7.5                        | -                  | Intraoperative |
| Gomez-<br>Rosado,<br>2022 | Colorectal<br>surgery | 70                       | Laparoscopic             | Medtronic                | Other<br>(TIVITA)          | Intensity,<br>Time | Anastomotic<br>Leak | 7.5                        | -                  | Intraoperative |

|                 |                       |    |              |                            |                           |                 |                          |     |     |                                 |
|-----------------|-----------------------|----|--------------|----------------------------|---------------------------|-----------------|--------------------------|-----|-----|---------------------------------|
| Pfahl, 2022     | Colorectal surgery    | 62 | Open         | Medtronic                  | Other (TIVITA)            | Intensity, Time | Anastomotic Leak         | 5   | -   | Intraoperative                  |
| Lobbes, 2022    | Colorectal surgery    | 18 | Laparoscopic | Olympus                    | Open source               | Intensity, Time | Anastomotic Leak         | 5   | -   | Intraoperative                  |
| Arpaia, 2022    | Colorectal surgery    | 11 | Laparoscopic | Olympus                    | Custom made software      | Intensity, Time | Anastomotic leak         | -   | -   | Intraoperative                  |
| Aydin, 2022     | Endocrine surgery     | 50 | Robotic      | Intuitive                  | Open source               | Intensity       | Other                    | 5   | -   | Intraoperative                  |
| Le Cui, 2017    | Endocrine surgery     | 29 | Open         | Other                      | Open source               | Intensity       | Organ identification     | -   | 0.5 | One hour prior to surgery       |
| Noltes, 2021    | Endocrine surgery     | 10 | Open         | Stryker                    | Open source, Paid Program | Intensity, Time | Organ identification     | 5   | -   | Intraoperative                  |
| Iritani, 2022   | Endocrine surgery     | 21 | Open         | Hamatsu Photonics, Olympus | Hamatsu Photonics         | Intensity       | Organ identification     | 2.5 | -   | Intraoperative                  |
| Inoue, 2015     | Hepatobiliary surgery | 24 | Open         | Mizuho Medical             | Paid Program              | Intensity       | Structure identification | 2.5 | -   | Intraoperative                  |
| Kawaguchi, 2017 | Hepatobiliary surgery | 21 | Open         | Hamatsu Photonics          | Hamatsu Photonics         | Intensity       | Structure identification | -   | -   | Intraoperative                  |
| Chen, 2021      | Hepatobiliary surgery | 24 | Laparoscopic | OptoMedic Technology       | Paid Program              | Intensity       | Structure identification | 10  | -   | 10 to 12 hours prior to surgery |

|                  |                        |     |              |                         |                    |                 |                              |      |      |                      |
|------------------|------------------------|-----|--------------|-------------------------|--------------------|-----------------|------------------------------|------|------|----------------------|
| Pujol-Cano, 2022 | Hepatobiliary surgery  | 44  | Laparoscopic | Olympus                 | Paid Program       | Intensity       | Structure identification     | 0.25 | -    | Anesthetic induction |
| Kawaguchi, 2013  | Hepatobiliary surgery  | 63  | Open         | Hamatsu Photonics       | Hamatsu Photonics  | Intensity       | Structure identification     | -    | -    | Intraoperative       |
| Shirata, 2018    | Pancreatic surgery     | 23  | Open         | Stryker                 | Hamatsu Photonics  | Intensity       | Other                        | 2.5  | -    | Intraoperative       |
| Rother, 2017     | Kidney transplantation | 57  | Open         | Stryker                 | Stryker            | Intensity, Time | Postoperative Graft function | -    | 0.25 | Intraoperative       |
| Rother, 2019     | Kidney transplantation | 77  | Open         | Stryker                 | Stryker            | Intensity, Time | Postoperative Graft function | -    | 0.2  | Intraoperative       |
| Ellebrecht, 2020 | Kidney transplantation | 36  | Open         | Pulsion Medical Systems | Other              | Intensity, Time | Postoperative Graft function | 25   | -    | Intraoperative       |
| Gerken, 2022     | Kidney transplantation | 128 | Open         | Stryker                 | Stryker            | Intensity, Time | Postoperative Graft function | -    | 0.02 | Intraoperative       |
| Ietto, 2021      | Kidney transplantation | 37  | Open         | Karl Storz              | Open source        | Intensity       | Postoperative Graft function | -    | 0.15 | Intraoperative       |
| Hashimoto, 2008  | Liver transplantation  | 21  | Open         | Other                   | Manual Calculation | Intensity, Time | Structure identification     | -    | 0.1  | Intraoperative       |
| Dousse, 2020     | Liver transplantation  | 76  | Open         | Other                   | Manual Calculation | Intensity, Time | Other                        | -    | 0.01 | Intraoperative       |

|                               |                              |     |                                                     |                      |                            |                    |                     |      |       |                |
|-------------------------------|------------------------------|-----|-----------------------------------------------------|----------------------|----------------------------|--------------------|---------------------|------|-------|----------------|
| Kim,<br>2021                  | Liver<br>transplantatio<br>n | 46  | Open                                                | Stryker              | Paid<br>Program            | Intensity          | Other               | -    | 0.025 | Intraoperative |
| Kamiya,<br>2015               | Esophageal<br>surgery        | 26  | Open                                                | Hamatsu<br>Photonics | Hamatsu<br>Photonics       | Intensity,<br>Time | Other               | -    | -     | Intraoperative |
| Yukaya,<br>2015               | Esophageal<br>surgery        | 27  | Open                                                | Mizuho<br>Medical    | Other                      | Intensity,<br>Time | Anastomotic<br>Leak | -    | 0.1   | Intraoperative |
| Koyanagi,<br>2016             | Esophageal<br>surgery        | 40  | Open                                                | Hamatsu<br>Photonics | Manual<br>Calculatio<br>n  | Perfusion<br>speed | Anastomotic<br>Leak | 2    | -     | Intraoperative |
| Ishige,<br>2019               | Esophageal<br>surgery        | 20  | Open                                                | Olympus              | Hamatsu<br>Photonics       | Intensity,<br>Time | Anastomotic<br>Leak | 1.25 | -     | Intraoperative |
| Sugimura,<br>2019             | Esophageal<br>surgery        | 20  | Open                                                | Hamatsu<br>Photonics | Hamatsu<br>Photonics       | Intensity,<br>Time | Other               | 12.5 | -     | Intraoperative |
| Nerup,<br>2020                | Esophageal<br>surgery        | 10  | Open,<br>Laparoscopic,<br>Thoracoscopic,<br>Robotic | Karl Storz           | Custom<br>made<br>software | Intensity,<br>Time | Anastomotic<br>Leak | -    | 0.25  | Intraoperative |
| Talavera-<br>Urquijo,<br>2020 | Esophageal<br>surgery        | 100 | Laparoscopic,<br>Thoracoscopic                      | Olympus              | Manual<br>Calculatio<br>n  | Perfusion<br>speed | Anastomotic<br>Leak | -    | 0.3   | Intraoperative |
| Koyanagi,<br>2021             | Esophageal<br>surgery        | 109 | Open                                                | Hamatsu<br>Photonics | Manual<br>Calculatio<br>n  | Perfusion<br>speed | Anastomotic<br>Leak | 1.25 | -     | Intraoperative |
| Ishikawa,<br>2022             | Esophageal<br>surgery        | 304 | Laparoscopic,<br>Thoracoscopic,<br>Robotic          | Stryker              | Stryker                    | Intensity,<br>Time | Anastomotic<br>Leak | 5    | -     | Intraoperative |
| Barnes,<br>2022               | Esophageal<br>surgery        | 20  | Laparoscopic,<br>Thoracoscopic                      | Stryker              | Open<br>source             | Intensity          | Other               | 5    | -     | Intraoperative |

|                     |                        |     |         |                      |                      |                 |                  |      |     |                |
|---------------------|------------------------|-----|---------|----------------------|----------------------|-----------------|------------------|------|-----|----------------|
| Hennig, 2022        | Esophageal surgery     | 13  | Open    | Medtronic            | Other (TIVITA)       | Intensity       | Anastomotic Leak | -    | -   | Intraoperative |
| Lin, 2022           | Esophageal surgery     | 84  | Open    | OptoMedic Technology | Hamatsu Photonics    | Intensity, Time | Anastomotic Leak | 0.75 | -   | Intraoperative |
| Von Kroge, 2022     | Esophageal surgery     | 20  | Open    | Stryker              | Custom made software | Intensity, Time | Anastomotic Leak | -    | -   | Intraoperative |
| Ninomiya, 2022      | Esophageal surgery     | 140 | Open    | Hamatsu Photonics    | Manual Calculation   | Perfusion speed | Anastomotic Leak | 1.4  | -   | Intraoperative |
| de Groot, 2022      | Esophageal surgery     | 63  | Robotic | Intuitive            | Open source          | Intensity, Time | Anastomotic Leak | 7.5  | -   | Intraoperative |
| Mastronardi, 2022   | Reconstructive surgery | 34  | Open    | Stryker              | Open source          | Intensity, Time | Flap perfusion   | -    | 0,2 | Intraoperative |
| Mazdeyasna, 2022    | Reconstructive surgery | 11  | Open    | Stryker              | Paid Program         | Intensity       | Flap perfusion   | -    | -   | Intraoperative |
| Van den Hoven, 2021 | Reconstructive surgery | 13  | Open    | Other                | Other                | Intensity, Time | Flap perfusion   | 7,5  | -   | Intraoperative |
| Schöpfer, 2022      | Reconstructive surgery | 67  | Open    | Other                | Other (Flow 800)     | Intensity, Time | Flap perfusion   | 10   | -   | Intraoperative |
| Varela, 2020        | Reconstructive surgery | 51  | Open    | Hamatsu Photonics    | Hamatsu Photonics    | Intensity       | Flap perfusion   | -    | 0,2 | Intraoperative |
| Girard, 2019        | Reconstructive surgery | 40  | Open    | Stryker              | Stryker              | Intensity, Time | Flap perfusion   | 5    | -   | Intraoperative |
| Adelwahab, 2019     | Reconstructive surgery | 71  | Open    | Stryker              | Stryker              | Intensity, Time | Flap perfusion   | 5    | -   | Intraoperative |
| Yang, 2018          | Reconstructive surgery | 10  | Open    | Stryker              | Stryker              | Intensity, Time | Flap perfusion   | -    | -   | Intraoperative |

|                   |                           |    |      |         |                      |                    |                   |     |   |                |
|-------------------|---------------------------|----|------|---------|----------------------|--------------------|-------------------|-----|---|----------------|
| Guo,<br>2018      | Reconstructive<br>surgery | 30 | Open | Stryker | Stryker              | Intensity,<br>Time | Flap<br>perfusion | 10  | - | Intraoperative |
| Wang,<br>2018     | Reconstructive<br>surgery | 17 | Open | Stryker | Stryker              | Intensity,<br>Time | Flap<br>perfusion | 7,5 | - | Intraoperative |
| Gorai,<br>2017    | Reconstructive<br>surgery | 81 | Open | Stryker | Hamatsu<br>Photonics | Intensity,<br>Time | Flap<br>perfusion | 2   | - | Intraoperative |
| Surowitz,<br>2015 | Reconstructive<br>surgery | 10 | Open | Stryker | Stryker              | Intensity          | Flap<br>perfusion | -   | - | Intraoperative |
| Cho,<br>2015      | Reconstructive<br>surgery | 10 | Open | Stryker | Stryker              | Intensity          | Other             | -   | - | Intraoperative |
| Munabi,<br>2014   | Reconstructive<br>surgery | 42 | Open | Stryker | Stryker              | Intensity          | Flap<br>perfusion | 10  | - | Intraoperative |
| Losken,<br>2012   | Reconstructive<br>surgery | 77 | Open | Stryker | Stryker              | Intensity,<br>Time | Flap<br>perfusion | 5   | - | Intraoperative |
